# Supplementary material for: Evaluation of the organisation and effectiveness of internal audits to govern patient safety in hospitals: a mixed-methods study
Source: PubMed Central journal article supplement — BMJ Open. 2017 Jul 10;7(7):e015506. doi: 10.1136/bmjopen-2016-015506 (PMC5734458; doi:10.1136/bmjopen-2016-015506), 2017-07-10
Supplement: bmjopen-2016-015506supp001.pdf [file bmjopen-2016-015506supp001.pdf]

## APPENDICES

### Appendix 1. Hospital sampling criteria for interviews

| Selection criterion                                                        | Description                                                                                                                                                                          |
|----------------------------------------------------------------------------|--------------------------------------------------------------------------------------------------------------------------------------------------------------------------------------|
| Variation in hospital type                                                 | University hospitals, tertiary teaching hospitals <sup>1</sup> and general hospitals .                                                                                               |
| Variation in standards and regulations for designing internal audit system | Different standards for the design of internal audit systems (e.g. NIAZ, JCI, VMS).                                                                                                  |
| >5 years of experience with internal auditing                              | Only hospitals with more than five years' experience with internal audits were included, because this assured that one internal audit cycle would have been completed.               |
| Variation in data sources used for internal audit                          | A distribution of hospitals with different sources of input for their internal audit; such as interviews, observations, surveys amongst employees and patients, and self-evaluation. |
| Medical specialist in audit team                                           | A distribution of hospitals with, and without medical specialists in their audit team.                                                                                               |
| Hours spent per internal audit                                             | Hospitals that spent less than 100, between 100–250 and more than 250 hours per audit.                                                                                               |
| Geographical spread/location                                               | Two different provinces per type of hospital.                                                                                                                                        |

<sup>1</sup> Tertiary teaching hospitals in the Netherlands provide highly specialised care and train doctors in collaboration with university hospitals.

## Appendix 2. Questionnaire 2012

### Content

1. Which standards are used by your hospital for the internal audit (multiple responses possible)?
  - Standards of accreditation institutes
  - Standards set by law
  - Standards set by profession
  - Standards set by hospital itself
  - Other, namely:
2. What is used as input for the internal audit in your hospital (multiple responses possible)?
  - Outcomes of self-evaluation by department
  - Outcomes of document analysis by audit team
  - Outcomes of interviews by audit team
  - Outcomes of site-visits by audit team
  - Outcomes of ad hoc measures by audit team
  - Other, namely:

### Organization

3. Who are the members of the audit team in your hospital (multiple responses possible)?
  - Medical specialists
  - Allied healthcare professionals
  - Nurses
  - Management
4. What is the total number of auditors in your hospital?
  - < 5
  - 5-10
  - 10-20
  - >20
5. Do auditors receive training and/or are they structurally evaluated (multiple responses possible)?
  - Training
  - Evaluation
  - No training, no evaluation
6. What is the time frame of one internal audit (from the first preparations to feedback of results to audited department)?  
..... months
7. What is the frequency of the internal audit?  
Once every ... year(s)

### Appendix 3. COREQ guidelines table

| No. Item                                       | Guide questions/description                                                                                                                              |                                                                                                                                                                                                                                         |
|------------------------------------------------|----------------------------------------------------------------------------------------------------------------------------------------------------------|-----------------------------------------------------------------------------------------------------------------------------------------------------------------------------------------------------------------------------------------|
| <b>Domain 1: Research team and reflexivity</b> |                                                                                                                                                          |                                                                                                                                                                                                                                         |
| <i>Personal Characteristics</i>                |                                                                                                                                                          |                                                                                                                                                                                                                                         |
| 1. Inter viewer/facilitator                    | Which author/s conducted the interview or focus group?                                                                                                   | SvG and MZ                                                                                                                                                                                                                              |
| 2. Credentials                                 | What were the researcher's credentials? E.g. PhD, MD                                                                                                     | 1 MA, 1 PhD                                                                                                                                                                                                                             |
| 3. Occupation                                  | What was their occupation at the time of the study?                                                                                                      | Research Fellows                                                                                                                                                                                                                        |
| 4. Gender                                      | Was the researcher male or female?                                                                                                                       | Both female                                                                                                                                                                                                                             |
| 5. Experience and training                     | What experience or training did the researcher have?                                                                                                     | Two researchers received training in interviewing. Both followed courses on qualitative research                                                                                                                                        |
| <i>Relationship with participants</i>          |                                                                                                                                                          |                                                                                                                                                                                                                                         |
| 6. Relationship established                    | Was a relationship established prior to study commencement?                                                                                              | Yes, to one of them. However, we made sure to act the same as in all other interviews (sending the topic guide prior to the interview, introducing ourselves, no small talk during the interview) so that this did not affect the data. |
| 7. Participant knowledge of the interviewer    | What did the participants know about the researcher? e.g. personal goals, reasons for doing the research                                                 | Broad outlines given                                                                                                                                                                                                                    |
| 8. Interviewer characteristics                 | What characteristics were reported about the interviewer/facilitator? e.g. Bias, assumptions, reasons and interests in the research topic                | Reasons for research                                                                                                                                                                                                                    |
| <b>Domain 2: study design</b>                  |                                                                                                                                                          |                                                                                                                                                                                                                                         |
| <i>Theoretical framework</i>                   |                                                                                                                                                          |                                                                                                                                                                                                                                         |
| 9. Methodological orientation and Theory       | What methodological orientation was stated to underpin the study? e.g. grounded theory, discourse analysis, ethnography, phenomenology, content analysis | Thematic analysis                                                                                                                                                                                                                       |
| <i>Participant selection</i>                   |                                                                                                                                                          |                                                                                                                                                                                                                                         |
| 10. Sampling                                   | How were participants selected? e.g. purposive, convenience, consecutive, snowball                                                                       | Purposively sampled                                                                                                                                                                                                                     |
| 11. Method of approach                         | How were participants approached? e.g. face-to-face, telephone, mail, email                                                                              | Face-to-face, telephone and email                                                                                                                                                                                                       |
| 12. Sample size                                | How many participants were in the study?                                                                                                                 | 43                                                                                                                                                                                                                                      |
| 13. Non-participation                          | How many people refused to participate or dropped out? Reasons?                                                                                          | Two not interviewed for lack of time                                                                                                                                                                                                    |
| <i>Setting</i>                                 |                                                                                                                                                          |                                                                                                                                                                                                                                         |
| 14. Setting of data collection                 | Where was the data collected? e.g. home, clinic, workplace                                                                                               | Clinic and workplace                                                                                                                                                                                                                    |
| 15. Presence of non-participants               | Was anyone else present besides the participants and researchers?                                                                                        | No                                                                                                                                                                                                                                      |
| 16. Description of sample                      | What are the important characteristics of the sample? e.g. demographic data, date                                                                        | Boards of Directors (n=5), Boards of                                                                                                                                                                                                    |

|                                        |                                                                                                                                 |                                                                                                                                                                                                                                                                   |
|----------------------------------------|---------------------------------------------------------------------------------------------------------------------------------|-------------------------------------------------------------------------------------------------------------------------------------------------------------------------------------------------------------------------------------------------------------------|
|                                        |                                                                                                                                 | Supervisors (n=5),<br>Quality and safety directors (n=7),<br>Quality officers (n=14),<br>Head of department or clinical manager (auditees) (n=12).<br>Of the interviewees, 56% was female, and 40% had six or more years of experience in their current function. |
| <i>Data collection</i>                 |                                                                                                                                 |                                                                                                                                                                                                                                                                   |
| 17. Interview guide                    | Were questions, prompts, guides provided by the authors? Was it pilot tested?                                                   | Interview guides were sent to interviewees prior to the interview. The topic guides were pilot tested.                                                                                                                                                            |
| 18. Repeat interviews                  | Were repeat interviews carried out? If yes, how many?                                                                           | No                                                                                                                                                                                                                                                                |
| 19. Audio/visual recording             | Did the research use audio or visual recording to collect the data?                                                             | Audiotaped                                                                                                                                                                                                                                                        |
| 20. Field notes                        | Were field notes made during and/or after the interview or focus group?                                                         | Yes, after some interviews                                                                                                                                                                                                                                        |
| 21. Duration                           | What was the duration of the inter views or focus group?                                                                        | 30–60 minutes                                                                                                                                                                                                                                                     |
| 22. Data saturation                    | Was data saturation discussed?                                                                                                  | Yes and reached                                                                                                                                                                                                                                                   |
| 23. Transcripts returned               | Were transcripts returned to participants for comment and/or correction?                                                        | If desired; no adjustments were made by interviewees                                                                                                                                                                                                              |
| <b>Domain 3: analysis and findings</b> |                                                                                                                                 |                                                                                                                                                                                                                                                                   |
| <i>Data analysis</i>                   |                                                                                                                                 |                                                                                                                                                                                                                                                                   |
| 24. Number of data coders              | How many data coders coded the data?                                                                                            | 3                                                                                                                                                                                                                                                                 |
| 25. Description of the coding tree     | Did authors provide a description of the coding tree?                                                                           | Yes                                                                                                                                                                                                                                                               |
| 26. Derivation of themes               | Were themes identified in advance or derived from the data?                                                                     | Identified in advanced and derived from the data                                                                                                                                                                                                                  |
| 27. Software                           | What software, if applicable, was used to manage the data?                                                                      | Atlas.ti software version 7.0                                                                                                                                                                                                                                     |
| 28. Participant checking               | Did participants provide feedback on the findings?                                                                              | No                                                                                                                                                                                                                                                                |
| <i>Reporting</i>                       |                                                                                                                                 |                                                                                                                                                                                                                                                                   |
| 29. Quotations presented               | Were participant quotations presented to illustrate the themes/findings? Was each quotation identified? e.g. participant number | Yes, but not with a participant number                                                                                                                                                                                                                            |
| 30. Data and findings consistent       | Was there consistency between the data presented and the findings?                                                              | Yes                                                                                                                                                                                                                                                               |
| 31. Clarity of major themes            | Were major themes clearly presented in the findings?                                                                            | Yes                                                                                                                                                                                                                                                               |
| 32. Clarity of minor themes            | Is there a description of diverse cases or discussion of minor themes?                                                          | Yes                                                                                                                                                                                                                                                               |

#### **Appendix 4. Topics for guiding interviews with stakeholders in the audit and governance process**

1. How are internal audits set up in your hospital?
2. Is the focus of the audit determined beforehand?
3. Which framework do you use for the internal audit and why?
4. What methods do you use to gather information and why?
5. What kind of information do you get from audits and how do you use it?
6. What does an audit result say about the actual state of a department?
7. To what extent do you use the internal audit to oversee patient safety?
8. To what extent do you use the internal audit to steer patient safety?
9. To what extent are internal audit results discussed with the board of supervisors?
10. To what extent does the internal audit contribute to the feeling of being 'in control'?
11. What were the advantages or disadvantages of the internal audit for your hospital?
12. How do you oversee the quality and safety in your hospital?

## Appendix 5. Organization and content of internal audit

Organization and content of the internal audit in Dutch hospitals (*n* = 68)

|                                                           | <i>n</i> | %   |
|-----------------------------------------------------------|----------|-----|
| <b>Frequency of audits<sup>§</sup></b>                    |          |     |
| Every year                                                | 6        | 9   |
| Every 2 years                                             | 7        | 10  |
| Every 3 years                                             | 9        | 13  |
| Every 4 years                                             | 45       | 66  |
| <b>Time frame of one internal audit</b>                   |          |     |
| 1 month                                                   | 6        | 9   |
| 2 months                                                  | 18       | 27  |
| 3 months                                                  | 17       | 25  |
| 4 months                                                  | 6        | 9   |
| 5 months                                                  | 2        | 3   |
| 6 months                                                  | 6        | 9   |
| 7 months                                                  | 2        | 3   |
| <b>Members of the audit team</b>                          |          |     |
| Medical specialists                                       | 46       | 68  |
| Allied healthcare professionals                           | 51       | 75  |
| Nurses                                                    | 65       | 96  |
| Management                                                | 57       | 84  |
| <b>Total number of auditors in hospital</b>               |          |     |
| 5–10                                                      | 1        | 1   |
| 10–20                                                     | 23       | 34  |
| >20                                                       | 44       | 65  |
| <b>Structural training and/or evaluation of auditors?</b> |          |     |
| Training                                                  | 55       | 81  |
| Evaluation                                                | 50       | 74  |
| No training, no evaluation                                | 6        | 9   |
| <b>Framework for audit</b>                                |          |     |
| Standards of accreditation institutes                     | 66       | 97  |
| Standards set by law                                      | 45       | 66  |
| Standards set by profession                               | 18       | 27  |
| Standards set by hospital itself                          | 22       | 32  |
| Other <sup>†</sup>                                        | 25       | 37  |
| <b>Input for audit</b>                                    |          |     |
| Outcomes of self-evaluation by department                 | 40       | 59  |
| Outcomes of document analysis by audit team               | 68       | 100 |
| Outcomes of interviews by audit team                      | 68       | 100 |
| Outcomes of site-visits by audit team                     | 68       | 100 |
| Outcomes of ad hoc measures by audit team                 | 23       | 34  |
| Other <sup>‡</sup>                                        | 14       | 21  |

<sup>§</sup> When responding to the questions regarding 'Frequency of audit', 'Time frame of audit' and 'Number of auditors', respondents could only choose one option, whereas when responding to the other questions, respondents could choose multiple options.

<sup>†</sup>ISO, VMS, HKZ, CCL, NEN, NTA, JACIE, MediRisk

¥Outcomes of other audits when present, such as audits by external experts and audits initiated by medical specialties; outcomes of satisfaction questionnaires amongst partner departments (such as an orthopedic department when the radiology department is being audited); outcomes of tracers; outcomes of chart reviews; outcomes of team climate inventory.
